# Supplementary material for: Applying the Three Delay Model for Non-communicable diseases: lessons learnt from emergency department admissions in Peru
Source: Research Square preprint supplement (doi:10.21203/rs.3.rs-7257280/v1), 2025-12-15
Supplement: Supplementary file 1 [file 190b78811ec6f04cde17ad4e.docx]

| **Supplementary Table S1** |  |  |  |  |  |
| --- | --- | --- | --- | --- | --- |
|  | **Attend to follow-up appointment** | **Do not attend to follow-up appointment** |  |  |  |
|  | **p** |  |  |
| Age, mean (SD) | 61.6 (1.3) | 58.6 (1.7) | 0.18 | 0.98 (0.97 - 1.01) |  |
| **Gender, n (%)** |  |  |  |  |  |
| Female | 47 (65.3%) | 25 (34.7%) | 0.81 | REF |  |
| Male | 53 (67.1%) | 26 (32.9%) |  | 0.95 (0.55 - 1.64) |  |
| **Educational level, n (%)** |  |  |  |  |  |
| < 7 years | 38 (76.0%) | 12 (24.0%) | 0.09 | REF |  |
| >= 7 year | 62 (62.0%) | 38 (38.0%) |  | 1.58 (0.83 - 3.02) |  |
| **Job, n (%)** |  |  |  |  |  |
| Employed | 55 (72.4%) | 21 (27.65) | 0.108 | REF |  |
| Unemployed/Retired | 45 (60.0%) | 30 (40.0%) |  | 1.45 (0.83 - 2.53) |  |
| **Number of diseases, n (%)** |  |  |  |  |  |
| One | 32 (52.5%) | 29 (47.5%) | **0.01** | REF | REF |
| Two | 30 (71.4%) | 12 (28.6%) |  | 0.60 (0.31 - 1.18) | 0.62 (0.31 - 1.22) |
| Three or more | 38 (79.2%) | 10 (20.8%) |  | **0.44 (0.21 - 0.90)** | **0.45 (0.22 - 0.94)*** |
| **Periodic contact with the system, n (%)** |  |  |  |  |  |
| No | 54 (60.7%) | 35 (39.3%) | 0.08 | REF | REF |
| Yes | 46 (74.2%) | 16 (25.8%) |  | 0.65 (0.36 - 1.18) | 0.66 (0.36 - 1.21)* |
| * Adjusted by age and gender |  |  |  |  |  |
