# Supplementary material for: Applying the Three Delay Model for Non-communicable diseases: lessons learnt from emergency department admissions in Peru
Source: Research Square preprint supplement (doi:10.21203/rs.3.rs-7257280/v1), 2025-12-15
Supplement: Supplementary file 2 [file 98c5db8b8eec635cacb5a4f8.xlsx]

## Sheet: Journeys
SUPPLEMENTARY TABLE S2 - Detailed journey to care of interviewees (N=20)
ID	How long have you known your diagnosis?	Diagnosis	Triggering event	Point of access to care for present episode	Route 1	Procedure 1	Result 1	Route 2	Procedure 2	Result 2	Route 3	Procedure 3	Result 3	Route 4	Procedure 4	Result 4	Route 5	Procedure 5	Result 5	Additional comments
P19	10 years	T2DM	Foot infection	Primary care (PHC)	PHC facility near home	Foot cleaning and wound care	Returns home	CH Hospital (Outpatient Clinic)	Evaluation by specialist	Returns home	CH Hospital (Outpatient)	Foot examination and referral to ED	Admitted to ED	CH Hospital (Emergency)	Foot wound care and cleaning	Discharged after two days	CH Hospital (Hospitalization)	Surgery on the same toe	Hospitalization
P15	20 years	T2DM	Wound on the left foot	Primary care (PHC)	PHC facility near home	Diabetes Checkup (received medication)	Returns home	SJL Hospital (Hospitalization)	Wound cleaning, toe amputation indicated	Voluntary discharge	CH Hospital (Emergency)	Toe amputation	Hospitalization	x	x	x	x	x	x
P11	5 years	T2DM/HT	Respiratory and heart problems	Primary care (PHC)	PHC facility near home	Not mentioned	Returns home	CH Hospital (Emergency)	Treatment for bronchopneumonia	Discharged two days later.	CH Hospital (Hospitalization)	Medical examinations and tests	Hospitalization	x	x	x	x	x	x
P01	2 months	T2DM	Blister on the foot	Primary care (PHC)	PHC facility near home	Receives ointments and drugs	Returns home	SJ Hospital (Outpatient)	Receives drugs (Not specified)	Returns home	AC Hospital (emergency)	Hospitalization for 30 days, recommendation for amputation.	Voluntary discharge, refuses amputation.	CH Hospital (Emergency)	Hospitalization for 30 days, foot amputation.	Discharged for outpatient care.	x	x	x	Patient was unaware of foot care, didn't notice the wound developing.
P17	12 years	T2DM	"Low blood sugar" Foot injury	Outpatient consultation (Public)	CH Hospital (Outpatient)	Regular check-up with two different doctors	Returns home. Refers dose change in treatment in last check-up.	CH Hospital (Emergency)	Glucose management and stabilitation (Fainted at the ED)	Discharged (same day)	CH Hospital (goes for foot injury, but find hyperglicemia)	It does not specify but it seems that was hospitalized.	Remains under monitoring at the time of interview	x	x	x	x	x	x	Refers multiple outpatient consultations. Refers interruption of insulin treatment.
P07	14 years	T2DM	Urinary infection	Outpatient consultation (Public)	GA Hospital (Outpatient)	Regular check-ups (every three months with endocrinologist)	Not specified	CH Hospital (Emergency)	Was treated, details not specified	Not specified	CH Hospital (Emergency)	Was treated at the ED, received antibiotics	Hospitalization, moved to medical ward.	x	x	x	x	x	x
P05	2 years	T2DM	"Decompensation" (details not available)	Outpatient consultation (Public)	PP Hospital (Outpatient)	Regular check-up	Requested to be transfered to CH hospital	CH Hospital (Outpatient clinic)	Examination and tests	Diagnosed with diabetes.	CH Hospital (Emergency)	Received insulin and metformin	Discharged	x	x	x	x	x	x
P16	15 years	T2DM/HT	Foot wound	Outpatient consultation (Public)	CH Hospital (Outpatient)	Received medication for the wound	Returns home	CH Hospital (Immediate care - outpatient)	None	Missed appointment. Goes home	Private podiatrist	Wound cleaning and recommendation to go to hospital	Returns home	CH Hospital (Emergency)	Wound care of infected finger	Remains at ED for treatment	x	x	x
P14	17 years	T2DM	Neuropathy	Outpatient consultation (Public)	Consultation (name not specified)	Procedure on left foot (received medication)	Returns home	PHC facility near home (name not specified)	Procedure on the same foot (received medication)	Returns home	Private podiatrist	Foot examination and recommendation to go to the hospital	Returns home	CH Hospital (Emergency)	Wound care and possible amputation of finger	Hospitalization	x	x	x
P10	7 years	T2DM	Diabetic foot (details not available)	Outpatient consultation (Public)	Travels from a different city to search private care	No care/procedures provided because of costs	Returns home	AL Hospital (Outpatient clinic)	Lacks requirement of referral form from city of origin. No care provided	Returns home	ESS Hospital (Outpatient)	Refers a minor procedure	Returns home	CH Hospital (Outpatient)	Evaluation by cardiovascular specialist	Refered to ED	CH Hospital (Emergency)	Receives treatment (unspecified)	Hospitalization
P08	1 year	T2DM	Hyperglicemia (refers glucemia at 400)	Emergency Department (ED)	CH Hospital (Emergency)	Diagnosed with type 2 Diabetes	Receives medication and referral to outpatient appointment	CH Clinic (Outpatient)	Regular check-up, was given insulin	Returns home	x	x	x	x	x	x	x	x	x	Refers several visits to the ED since diagnosis. Despite multiple ED visits, patient its not clear on dietary care.
P06	10 years	HT	Pre-myocardial infarction	Emergency Department (ED)	CH Hospital (Emergency)	Hospitalized for two days	Receives prescription and medication	CH Hospital (Emergency)	Hospitalized for 10 days	Discharged. Indication to return for lab results in 20 days but couldn't return.	x	x	x	x	x	x	x	x	x	Refers 3-4 prior episodes of "pre-infarction".
P20	6 years	HT	Dialysis catheter change	Emergency Department (ED)	CH Hospital (Emergency)	Went to ED for catheter change	Returns home	x	x	x	x	x	x	x	x	x	x	x	x
P04	5 years	T2DM Possibly HT	Cerebral hemorrhage - Stroke	Emergency Department (ED)	CH Hospital (Emergency)	Not specified	Hospitalized	CH Hospital (Hospitalization)	Not specified	Discharged	CH Hospital (Outpatient)	Receives treatment and lab tests.	Returns home	x	x	x	x	x	x
P12	3 years	HT	"Procedure on the rectum" (unintelligible in the transcript)	Emergency Department (ED)	Health establishment (Not specified)	Operation	Hospitalized. Discharged after eight days.	CH Hospital (Hospitalization?)	Procedure on the appendix and gallbladder	Discharged	CH Hospital (Emergency)	Treatment for hospital-acquired pneumonia	Hospitalization. Still under treatment.	x	x	x	x	x	x
P13	12 years	T2DM	Neuropathy	Emergency Department (ED)	CH Hospital (Hospitalization?)	Finger amputation	Hospitalized for eight days	CH Clinic (Outpatient)	Procedure with the cardiovascular specialist on another finger	Returns home	CH Hospital (Hospitalization)	Amputation of another toe	Hospitalization	x	x	x	x	x	x
P09	NA	T2DM/HT	Pre-myocardial infarction	Emergency Department (ED)	Emergency (Facility not specified)	Not mentioned	Hospitalized	CH Hospital (unspecified)	Vascular treatment (not specified)	Not mentioned	CH Hospital (Emergency)	Pre-infarction management	Hospitalization	x	x	x	x	x	x	Refers a pre-myocardial infarction one year prior interview.
P18	> 20 years	HT	Myocardial infarction	Private Consultation	Private facility	Blood presure management (Recurrent episodes)	Returns home	CH Hospital (Emergency)	Cardiac catheterization procedure	Remains at ED at the time of interview	x	x	x	x	x	x	x	x	x
P02	7 years	T2DM	Hyperglycemia (refers glicemia at 555)	Private Consultation	Private facility	Prescribed metformin and glibenclamide.	Returns home	CH Hospital (Emergency)	Glucose management. Receives insulin	Returns home	CH Hospital (Emergency)	Glucose management	Discharged and referred to an outpatient consultation.	Outpatient consultation	Check-up and lab tests	Returns home	x	x	x	Refers only goes to ED for management and treatment with insulin, and does not make outpatient appointments.
P03	20 years	T2DM/HT	Cerebral Infarction - Stroke	Private Consultation	Private facility	Diabetes Checkup (received medication)	Returns home	CH Hospital (Emergency)	Management and monitoring for stroke	Discharged	x	x	x	x	x	x	x	x	x
Table developed from the descriptions of the interviewees.
